# Supplementary material for: Genotype Change in Circulating JEV Strains in Fujian Province, China
Source: MDPI journal article supplement (doi:10.3390/v15091822), 2023-08-26
Supplement: s1 [file s1]

**Supplementary Table S1.** Information on pig farms from which samples were collected

| County       | Farm | Farm size | Aerage Temp.°C | Altitude (m) | Longitude  | Latitude  |
|--------------|------|-----------|----------------|--------------|------------|-----------|
| Fuqing (FQ)  | YC   | >5000     | 19°C-23°C      | 7            | 119.563087 | 25.473633 |
| Sanming (SM) | YS   | >3000     | 14°C-19°C      | 387          | 117.437698 | 26.174683 |
| Nanping (NP) | YR   | >2000     | 16°C-20°C      | 212          | 118.7005   | 27.492241 |
| Nanping (NP) | LTS  | >2000     | 15°C-19°C      | 341          | 118.585342 | 28.122961 |
